# Stroke Risk in Systolic and Combined Systolic and Diastolic Hypertension Determined Using Ambulatory Blood Pressure

## The Ohasama Study

Ryusuke Inoue, Takayoshi Ohkubo, Masahiro Kikuya, Hirohito Metoki, Kei Asayama, Taku Obara, Takuo Hirose, Azusa Hara, Haruhisa Hoshi, Junichiro Hashimoto, Kazuhito Totsune, Hiroshi Satoh, Yoshiaki Kondo, and Yutaka Imai

**Background:** To investigate the risk of stroke in subjects with isolated systolic hypertension (ISH), isolated diastolic hypertension (IDH), and combined systolic and diastolic hypertension (SDH) in a Japanese general population, we used 24-h ambulatory blood pressure (ABP) and casual-screening blood-pressure (CBP) readings.

**Methods:** Subtypes of hypertension were defined based on systolic blood pressure (SBP) >135 mm Hg or diastolic blood pressure (DBP) >80 mm Hg for 24-h ABP, and SBP >140 mm Hg or DBP >90 mm Hg for CBP. We obtained 24-h ABP and CBP data for 1271 (40% male) subjects aged ≥40 years (mean age, 61 years) without a history of symptomatic stroke; their stroke-free survival was then determined. The prognostic significance of each subtype of hypertension was determined by Cox proportional hazard analysis.

**Results:** There were 113 symptomatic strokes during follow-up (mean time, 11 years). Compared with normo-

tension, among the hypertension subtypes determined by 24-h ABP, the adjusted relative hazards (RHs) of stroke were 2.24 for ISH ( $P = .002$ ) and 2.39 for SDH ( $P = .0004$ ). The association was less marked among subtypes determined by CBP (RH = 1.40 and  $P = .13$  for ISH; RH = 2.07 and  $P = .017$  for SDH). The IDH group was excluded from the Cox analysis because both the prevalence and the number of events were low in this group.

**Conclusions:** Isolated systolic hypertension, as determined by 24-h ABP measurements, was associated with a high risk of stroke, similar to that found in SDH subjects; this suggests that the prognosis of hypertensive patients would be improved by focusing treatment on 24-h systolic ABP. *Am J Hypertens* 2007;20:1125–1131 © 2007 American Journal of Hypertension, Ltd.

**Key Words:** Systolic hypertension, ambulatory blood pressure, stroke.

**T**he relative prognostic significance of blood pressure (BP) components depends on age.<sup>1</sup> Isolated systolic hypertension (ISH), which is more prevalent among elderly patients, as well as combined systolic

and diastolic hypertension (SDH), is a strong risk factor of cardiovascular diseases.<sup>2–7</sup> In contrast, the cardiovascular risk of isolated diastolic hypertension (IDH), which is more common among younger patients, is considered to be

Received January 9, 2007. First decision March 27, 2007. Accepted April 15, 2007.

From the 21st Century COE Program Comprehensive Research and Education Center for Planning of Drug Development and Clinical Evaluation (RI, TO, HM, KA, JH, KT, HS, YK, YI), Tohoku University, Comprehensive Research and Education Center for Planning of Drug Development and Clinical Evaluation (TO, KA, JH), Tohoku University Graduate School of Pharmaceutical Sciences and Medicine, and Department of Clinical Pharmacology and Therapeutics (MK, HM, TO, TH, AH, KT, YI), Tohoku University Graduate School of Pharmaceutical Sciences and Medicine, Sendai, Japan; and Department of Internal Medicine (HH), Ohasama Hospital, Iwate, Japan.

Supported by Grants for Scientific Research 15790293, 17790382, 18390192, and 18590587 from the Ministry of Education, Culture,

Sports, Science, and Technology, Tokyo, Japan; Grants-in-Aid 16.54041 and 18.54042 from the Japanese Society for the Promotion of Science, Tokyo, Japan; Health Science Research Grants and Medical Technology Evaluation Research Grants from the Ministry of Health, Labor and Welfare, Tokyo, Japan; the Japanese Atherosclerosis Prevention Fund, Tokyo, Japan; the Uehara Memorial Foundation, Tokyo, Japan; the Mitsubishi Pharma Research Foundation, Osaka, Japan; and the Takeda Medical Research Foundation, Osaka, Japan.

Address correspondence and reprint requests to Dr. Takayoshi Ohkubo, Department of Clinical Pharmacology and Therapeutics, Tohoku University Graduate School of Pharmaceutical Sciences, 1-1 Seiryō-cho, Aoba-ku, Sendai 980-8574, Japan; e-mail: tohkubo@mail.tains.tohoku.ac.jp

only slightly higher than that of normotension.<sup>6,7</sup> However, these studies were based on data obtained by casual-screening blood pressure (CBP), which is biased and therefore unreliable.<sup>8–10</sup> In our previous study, using data derived from home BP measurement, which was shown to be superior to CBP for predicting cardiovascular disease,<sup>11</sup> we found that systolic hypertension was a stronger risk factor for cardiovascular diseases than IDH.<sup>12</sup> However, only one previous study investigated the relationship between systolic or diastolic hypertension and the risk of target-organ damage, using data derived from 24-h ambulatory BP (ABP) monitoring (ABPM).<sup>13</sup> In the present study, we analyzed the stroke risk of each subtype of hypertension using data derived from ABPM, which was shown to be superior to CBP for predicting cardiovascular events in the general population.<sup>14–18</sup> In addition, we assessed the stroke risk of each subtype of hypertension using CBP data.

## Methods

### Design

The background rationale, study population, and BP measurements used in the Ohasama Study were presented in detail elsewhere.<sup>14–16,19</sup> The study protocol was approved by the Institutional Review Board of Tohoku University School of Medicine and by the Department of Health of the Ohasama Town Government.

### Study Population

The present study is part of a longitudinal observational study of subjects who have participated in the BP measurement project in Ohasama, Iwate Prefecture, Japan, since 1987. The characteristics of this cohort were described previously.<sup>14–16</sup> Also, the representativeness of the study participants has been fully described in a previous paper.<sup>14</sup> In the present study of Ohasama inhabitants who were  $\geq 40$  years old ( $n = 2716$ ), subjects who were hospitalized ( $n = 121$ ), demented or bedridden ( $n = 31$ ), or working outside of Ohasama ( $n = 575$ ) were excluded. Thus, 1989 eligible individuals were initially identified, and 1542 subjects gave written, informed consent and participated in this study. Of the 1542 subjects, 78 had a previous history of stroke or transient ischemic attack (TIA). These subjects were therefore excluded from the present study dealing with stroke/TIA and BP. Another 193 subjects were also excluded because of a lack of CBP data. Data from the remaining 1271 subjects were analyzed.

### ABPM

Well-trained public health nurses visited each participant on a weekday morning to attach the ABPM device, and then revisited the participants to detach the device the next morning. Participants were asked to keep a diary in which they recorded their daily activities, including the time at which they went to bed and when they arose. Ambulatory BP data were included in the analysis when the monitoring

period was  $>8$  h awake (daytime) and  $>4$  h in bed (nighttime). These periods were estimated from the subjects' diaries. The mean duration  $\pm$  SD of monitoring was  $22.6 \pm 2.4$  h; the mean number of measurements  $\pm$  SD was  $45.2 \pm 4.9$ .<sup>19</sup> Artfactual readings during ABPM were defined according to previously described criteria,<sup>20</sup> and were omitted from the analysis. The averages of 24-h, daytime, and nighttime BP values were calculated for each subject.

### CBP Measurements

Annual health checkups, including BP measurement and hematological examination, are available to all Japanese citizens aged  $\geq 40$  years. During these checkups, BP is measured twice consecutively in the sitting position, after a rest of at least 2 min, by nurses or technicians using a semiautomated device. The average of the two readings, defined as the CBP, was used in the present analysis.

### BP Monitoring Devices

Ambulatory BP was monitored using the ABPM-630 (Nippon Colin, Komaki, Japan), a fully automatic device that was preset to measure BP every 30 min.<sup>20</sup> Although systolic BP (SBP) and diastolic BP (DBP) were measured by both the cuff-oscillometric method and the microphone method, only data obtained by the cuff-oscillometric method were used in the analysis. Casual-screening blood pressure was measured with the USM-700F (UEDA Electronic Works Co. Ltd., Tokyo, Japan), an automatic device based on the Korotkoff sound technique (microphone method). Because almost all subjects' arm circumferences were  $<34$  cm, a standard arm cuff was used for both ABP and CBP measurements. Both the ABPM device and the CBP measuring device used in the present study were previously validated,<sup>19,21</sup> and meet the criteria of the Association for the Advancement of Medical Instrumentation.<sup>22</sup>

### Definition of Hypertension Subtypes

Hypertension subtypes derived from 24-h ABPM were defined according to the criteria of the Japanese Society of Hypertension Guidelines for the Management of Hypertension, 2004.<sup>23</sup> Isolated systolic hypertension was defined as SBP  $\geq 135$  mm Hg and DBP  $<80$  mm Hg; IDH was defined as SBP  $<135$  mm Hg and DBP  $\geq 80$  mm Hg; SDH was defined as SBP  $\geq 135$  mm Hg and DBP  $\geq 80$  mm Hg; and normotension was defined as SBP  $<135$  mm Hg and DBP  $<80$  mm Hg.

Hypertension subtypes derived from daytime ABPM were defined according to the criteria of the Seventh Report of the Joint National Committee on Prevention, Detection, Evaluation, and Treatment of High Blood Pressure (JNC7).<sup>24</sup> Isolated systolic hypertension was defined as SBP  $\geq 135$  mm Hg and DBP  $<85$  mm Hg; IDH was defined as SBP  $<135$  mm Hg and DBP  $\geq 85$  mm Hg; SDH was defined as SBP  $\geq 135$  mm Hg and DBP  $\geq 85$  mm Hg;

**Table 1.** Baseline mean age and blood pressure values

| Variables | Overall  | Stroke          |           | Type of stroke |             |
|-----------|----------|-----------------|-----------|----------------|-------------|
|           |          | Did not Develop | Developed | Ischemic       | Hemorrhagic |
| <i>n</i>  | 1271     | 1158            | 113       | 74             | 34          |
| Age       | 61 ± 10  | 61 ± 10         | 68 ± 9*   | 68 ± 9         | 67 ± 9      |
| 24-h      |          |                 |           |                |             |
| SBP       | 123 ± 13 | 122 ± 13        | 132 ± 13* | 131 ± 13       | 134 ± 15    |
| DBP       | 72 ± 8   | 72 ± 8          | 76 ± 8*   | 76 ± 8         | 77 ± 8      |
| Daytime   |          |                 |           |                |             |
| SBP       | 129 ± 14 | 128 ± 14        | 137 ± 15* | 136 ± 13       | 141 ± 17    |
| DBP       | 76 ± 8   | 76 ± 8          | 80 ± 9*   | 80 ± 8         | 82 ± 10     |
| Nighttime |          |                 |           |                |             |
| SBP       | 112 ± 14 | 111 ± 14        | 121 ± 15* | 121 ± 16       | 121 ± 16    |
| DBP       | 64 ± 8   | 64 ± 8          | 68 ± 8*   | 68 ± 8         | 68 ± 9      |
| CBP       |          |                 |           |                |             |
| SBP       | 131 ± 19 | 130 ± 18        | 140 ± 20* | 140 ± 19       | 138 ± 22    |
| DBP       | 74 ± 11  | 74 ± 11         | 77 ± 11*  | 78 ± 11        | 77 ± 12     |

CBP = casual blood pressure; DBP = diastolic blood pressure; SBP = systolic blood pressure.

Data are presented as means ± SD. Hemorrhagic stroke included intracerebral hemorrhage and subarachnoid hemorrhage.

\*  $P < .001$ .

and normotension was defined as SBP <135 mm Hg and DBP <85 mm Hg.

Similarly, hypertension subtypes derived from night-time ABPM were defined according to the criteria of JNC7. Isolated systolic hypertension was defined as SBP ≥120 mm Hg and DBP <75 mm Hg; IDH was defined as SBP <120 mm Hg and DBP ≥75 mm Hg; SDH was defined as ≥120 mm Hg and DBP ≥75 mm Hg; and normotension was defined as SBP <120 mm Hg and DBP <75 mm Hg.

Hypertension subtypes derived from CBP were defined as follows. Isolated systolic hypertension was defined as SBP ≥140 mm Hg and DBP <90 mm Hg; IDH was defined as SBP <140 mm Hg and DBP ≥90 mm Hg; SDH was defined as SBP ≥140 mm Hg and DBP ≥90 mm Hg; and normotension was defined as SBP <140 mm Hg and DBP <90 mm Hg.

## Follow-Up and Outcome

Residence in Ohasama (as of December 31, 2001) was confirmed by residents' registration cards. In Japan, these cards are considered accurate and reliable because they are used for pensions and social security benefits. The incidence of stroke and TIA until December 31, 2001 was determined by reviewing the Stroke Registration System of Iwate Prefecture, death certificates, National Health Insurance receipts, and questionnaires sent to each household at the time of ABPM. This information was then confirmed by checking the medical records of Ohasama Hospital, which is the only hospital located in the town, and it is where >90% of the subjects have their regular checkups. Almost all stroke cases were admitted to Ohasama Hospital, where the diagnosis was confirmed by computed tomography or magnetic resonance imaging of

the brain. The diagnoses of subjects who were admitted elsewhere were determined by reviewing case information provided by the Stroke Registration System of Iwate Prefecture. Less than 2% of subjects were admitted elsewhere. The diagnostic criteria of stroke subtypes were based on the Classification of Cerebrovascular Disease III of the United States National Institute of Neurological Disorders and Stroke.<sup>25</sup> We defined cerebral infarction as ischemic stroke, and we defined intracerebral hemorrhage and subarachnoid hemorrhage as hemorrhagic stroke.

## Data Collection and Analysis

Information on smoking status, the use of antihypertensive medication at baseline, and past history of heart disease, diabetes mellitus (DM), and hypercholesterolemia was obtained from questionnaires sent to each household at the time of ABPM and from Ohasama Hospital's medical records, which included the results of laboratory investigations performed at the time of annual health checkups. Subjects using lipid-lowering drugs, or those with serum cholesterol levels ≥5.68 mmol/L, were considered to have hypercholesterolemia. Subjects with a fasting glucose level of ≥7.0 mmol/L or a nonfasting glucose level of ≥11.1 mmol/L, or those using insulin or oral antihyperglycemic drugs, were defined as having DM. A past history of heart disease included a history of myocardial infarction, angina pectoris, atrial fibrillation, or cardiac failure. The association between hypertension subtypes and the incidence of first stroke or TIA was examined using Cox proportional hazards regression,<sup>26</sup> adjusted for age, gender, smoking status, the use of antihypertensive medication, and history of heart disease, DM, or hypercholesterolemia. The dependent variable in these analyses was the number of days from date of ABPM to date of

**Table 2.** Baseline mean age and blood pressure values for each hypertension subtype

|              | ISH      | IDH      | SDH      | NT       | P (ANOVA) |
|--------------|----------|----------|----------|----------|-----------|
| 24-h         |          |          |          |          |           |
| n            | 88       | 37       | 146      | 1000     |           |
| Total stroke | 22       | 4        | 24       | 63       |           |
| Ischemic     | 12       | 4        | 14       | 44       |           |
| Hemorrhagic  | 9        | 0        | 9        | 16       |           |
| Age          | 71 ± 8   | 58 ± 8*  | 63 ± 9   | 60 ± 10* | <.001     |
| SBP          | 140 ± 5  | 132 ± 2  | 146 ± 8  | 118 ± 9  | <.001     |
| DBP          | 76 ± 3   | 82 ± 2   | 86 ± 5   | 69 ± 6   | <.001     |
| Daytime      |          |          |          |          |           |
| n            | 214      | 5        | 178      | 874      |           |
| Total stroke | 33       | 0        | 32       | 48       |           |
| Ischemic     | 21       | 0        | 18       | 35       |           |
| Hemorrhagic  | 10       | 0        | 13       | 11       |           |
| Age          | 66 ± 10  | 56 ± 7§  | 62 ± 9   | 60 ± 10  | <.001     |
| SBP          | 141 ± 5  | 133§     | 150 ± 10 | 121 ± 8  | <.001     |
| DBP          | 81 ± 4   | 86§      | 90 ± 5   | 72 ± 6   | <.001     |
| Nighttime    |          |          |          |          |           |
| n            | 210      | 1        | 118      | 942      |           |
| Total stroke | 34       | 0        | 21       | 58       |           |
| Ischemic     | 23       | 0        | 13       | 38       |           |
| Hemorrhagic  | 9        | 0        | 8        | 17       |           |
| Age          | 68 ± 9   | 74§      | 63 ± 9   | 60 ± 9   | <.001     |
| SBP          | 128 ± 7  | 119§     | 138 ± 10 | 105 ± 8  | <.001     |
| DBP          | 69 ± 4   | 76§      | 80 ± 5   | 61 ± 6   | <.001     |
| CBP          |          |          |          |          |           |
| n            | 238      | 18       | 91       | 924      |           |
| Total stroke | 36       | 1        | 14       | 62       |           |
| Ischemic     | 22       | 1        | 9        | 42       |           |
| Hemorrhagic  | 12       | 0        | 4        | 18       |           |
| Age          | 67 ± 9   | 63 ± 11* | 61 ± 9*  | 60 ± 10* | <.001     |
| SBP          | 153 ± 13 | 135 ± 4  | 161 ± 14 | 122 ± 11 | <.001     |
| DBP          | 78 ± 8   | 93 ± 4   | 97 ± 7   | 70 ± 9   | <.001     |

ABP = ambulatory blood pressure; CBP = casual blood pressure; DBP = diastolic blood pressure; IDH = isolated diastolic hypertension; ISH = isolated systolic hypertension; SBP = systolic blood pressure; SDH = systolic and diastolic hypertension; NT = normotension.

Data are presented as means ± SD. Unit of each blood pressure value is mm Hg.

\* Not significantly different.

§ Excluded from analysis because of small numbers of subjects.

stroke/TIA or censoring. Stroke/TIA-free survivors were censored as of December 31, 2001. When examining the incidence of stroke/TIA, death from causes other than fatal stroke events was censored. The analysis included only the first event in those subjects who had multiple nonfatal events.

The estimated relative hazard (RH) and 95% confidence interval (95% CI) of variables were derived from the coefficient and its standard error, as determined by the Cox proportional hazards model.

## Results

### Subjects' Characteristics

The overall mean age of subjects was 61 years, and the male:female ratio was 40:60. There were 1271 study subjects, and at baseline, 245 (19%) were classified as current or ex-smokers, 350 (28%) were being treated with antihypertensive medication, 14 (1.1%) were classified as having a history of heart disease, 220 (17%) had a history of DM, and 202 (16%) had a history of hypercholesterolemia.

### Follow-Up and Outcome

The mean duration of follow-up ± SD was 11.1 ± 2.7 years. Of 1271 subjects, 192 died and 25 moved out of the region during the follow-up period. A first stroke or TIA occurred in 113 subjects, including cerebral infarction in 74 (65%), intracerebral hemorrhage in 24 (21%), subarachnoid hemorrhage in 10 (9%), TIA in 3 (2.6%), and unknown cause in 2 (1.8%). The mean time period ± SD between the 24-h ABPM and stroke was 5.6 ± 3.4 years.

### Profiles of BP Values

All ABP and CBP values, as well as age at baseline, were significantly higher in subjects who developed stroke than in those who did not (Table 1) ( $P < .001$ ). There were no differences between the BP values of ischemic stroke patients and hemorrhagic stroke patients. However, hemorrhagic stroke patients had a trend toward higher daytime BP indices than ischemic stroke subjects.

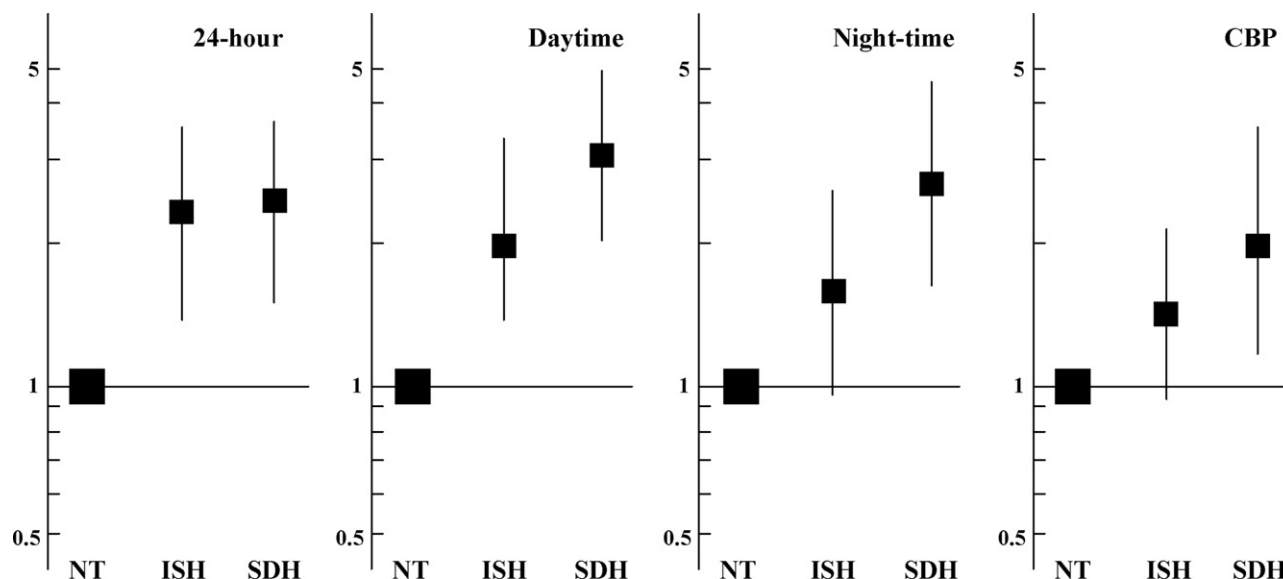

**FIG. 1.** Adjusted relative hazards (RHs) and 95% confidence intervals (95% CIs) for stroke risk of hypertension subtypes as determined by 24-h ambulatory blood pressure (ABP) monitoring or casual-screening blood-pressure (CBP) measurement. Solid squares represent RHs compared with the reference, adjusted for age, gender, smoking status, use of antihypertensive medication, and history of heart disease, diabetes mellitus, or hypercholesterolemia; they are sized in proportion to the number of events observed. Vertical lines represent 95% CIs. These are plotted on a log scale. NT = normotension; ISH = isolated systolic hypertension; SDH = systolic and diastolic hypertension.

Table 2 shows the BP value and age of each hypertension subtype assessed by ANOVA. Age, SBP, and DBP were all significantly different among the subtypes determined by both ABP and CBP ( $P < .001$ ). However, there was no significant difference between the age of IDH patients and that of normotensive patients determined by 24-h ABP. Also, there were no significant differences in the ages of subjects with IDH, subjects with SDH, and normotensive subjects determined by CBP. Systolic blood pressure and DBP were highest in subjects with SDH determined by both ABP and CBP. The age of ISH subjects was significantly higher than that of patients with other subtypes. Subjects with IDH, as determined by daytime or nighttime ABP, were excluded from the analysis because of the low number of subjects.

### Predictive Value of Hypertension Subtype

Figure 1 shows the RHs and 95% CIs for the total stroke risk of each hypertension subtype compared with normotension. Among subjects classified by 24-h ABP, the RHs for stroke incidence were significantly higher in SDH subjects (RH = 2.39; 95% CI, 1.48 to 3.87;  $P = .0004$ ) and ISH subjects (RH = 2.24; 95% CI, 1.33 to 3.76;  $P = .0024$ ) than in normotensive subjects. Among subjects classified by daytime ABP, the RHs were significantly higher in ISH subjects (RH = 2.04; 95% CI, 1.29 to 3.22;  $P = .0023$ ) and SDH subjects (RH = 3.16; 95% CI, 2.00 to 5.01;  $P < .0001$ ) than in normotensive subjects. Among subjects classified by nighttime ABP, the RH was significantly higher in SDH subjects (RH = 2.62; 95% CI, 1.55 to 4.41;  $P = .0003$ ) than in normotensive subjects. Isolated systolic hypertension tended to be associated with a higher

RH (RH = 1.52; 95% CI, 0.97 to 2.40;  $P = .07$ ) than normotension. However, the stroke risk was not significantly different between ISH subjects and normotensive subjects.

Among subjects classified by CBP, the RH was significantly higher in SDH subjects (RH = 2.07; 95% CI, 1.14 to 3.76;  $P = .017$ ) than in normotensive subjects. Isolated systolic hypertension tended to be associated with a higher RH (RH = 1.40; 95% CI, 0.91 to 2.14;  $P = .13$ ) than normotension. However, the stroke risk was not significantly different between ISH subjects and normotensive subjects.

In each analysis, the IDH group was excluded from the Cox model because both the prevalence and the number of events were low in this group.

### Discussion

The present study involved the longitudinal observation of a representative sample of the general population living in a rural Japanese community. The main findings of this study are that, among a middle-aged to elderly population: 1) SDH had strong predictive value for stroke; and 2) ISH was also a strong risk factor for stroke. Several studies reported that SDH or ISH is a strong risk factor for cardiovascular disease.<sup>2-7</sup>

We previously reported that SBP determined by ABPM is a strong and independent predictor of stroke, and that SBP is more useful in daily practice than other BP indices.<sup>27</sup> In the present analysis, we confirmed that the risk of stroke morbidity was high in subjects with SDH or ISH. Thus, our results indicate that SBP, but not DBP, is a strong predictor of stroke morbidity when hypertension subtypes are determined by ABPM.

Many previous studies concluded that ISH as determined on CBP has a high prognostic value for cardiovascular disease.<sup>2–7</sup> However, in the present study, the predictive power of ISH as determined by CBP was not significant, even though stroke risk associated with ISH tended to be higher than that associated with IDH or normotension. Such inconsistency may be attributed to our study's small sample size and the short observation period compared to previous prospective studies that involved large numbers of subjects and reported a statistically significant association between CBP and stroke risk. However, ABPM detected the stroke risk adequately, despite the short observational period and small sample. It was shown previously that the predictive power for stroke of ABPM is superior to that of CBP.<sup>14–18</sup> The present study again demonstrated the superiority of ABPM.

Isolated diastolic hypertension has not often been studied. Most previous studies found that the risk of IDH is not high.<sup>6,7,12,13</sup> However, several recent studies reported that the risk of IDH is not negligible. Fang et al reported that IDH and ISH were both independent predictors of stroke.<sup>28</sup> Franklin et al reported that IDH is significantly associated with metabolic syndrome,<sup>29</sup> and that younger IDH subjects are likely to develop systolic hypertension.<sup>30</sup> These reports were based on CBP data. Thus, it is necessary to use ABPM data to determine whether the stroke risk of IDH is low. However, in the present study, the number of subjects with IDH was low. There were only 37 subjects with IDH, determined on the basis of 24-h ABP, and only 18 subjects with IDH, determined on the basis of CBP. In addition, IDH subjects might have a lower risk of stroke because they are younger than subjects with ISH or SDH. Thus, it is necessary to follow these subjects until a sufficient number of IDH subjects is gathered and their outcomes are observed.

## Conclusions

Isolated systolic hypertension, as determined by 24-h ABP measurements, was associated with a high risk of stroke that was similar to that found in SDH subjects. This suggests that the prognosis of hypertension would be improved by focusing treatment on 24-h systolic ABP.

## Acknowledgments

The authors are grateful to the staff members of the Iwate Prefecture Stroke Registry for their valuable support of the follow-up survey.

## References

1. Khattar RS, Swales JD, Dore C, Senior R, Lahiri A: Effect of aging on the prognostic significance of ambulatory systolic, diastolic, and pulse pressure in essential hypertension. *Circulation* 2001;104:783–789.
2. Staessen JA, Gasowski J, Wang JG, Thijs L, Hond ED, Boissel JP, Coope J, Ekblom T, Gueyffier F, Liu L, Kerlikowske K, Pocock S, Fagard RH: Risks of untreated and treated isolated systolic hypertension in the elderly: meta-analysis of outcome trials. *Lancet* 2000;355:865–872.
3. SHEP Cooperative Research Group: Prevention of stroke by anti-hypertensive drug treatment in older persons with isolated systolic hypertension: final results of the Systolic Hypertension in the Elderly Program (SHEP). *JAMA* 1991;265:3255–3264.
4. Staessen JA, Fagard R, Thijs L, Celis H, Arabidze GG, Birkenhager WH, Bulpitt CJ, de Leeuw PW, Dollery CT, Fletcher AE, Forette F, Leonetti G, Nachev C, O'Brien ET, Rosenfeld J, Rodicio JL, Tuomilehto J, Zanchetti A: Randomized double-blind comparison of placebo and active treatment for older patients with isolated systolic hypertension. The Systolic Hypertension in Europe (Syst-Eur) Trial Investigators. *Lancet* 1997;350:757–764.
5. Liu L, Wang JG, Gong L, Liu G, Staessen JA: Comparison of treatment and placebo in older Chinese patients with isolated systolic hypertension. Systolic Hypertension in China (Syst-China) Collaborative Group. *J Hypertens* 1998;16:1823–1829.
6. Fang J, Madhavan S, Cohen H, Alderman MH: Isolated diastolic hypertension: a favorable finding among young and middle-aged hypertensive subjects. *Hypertension* 1995;26:377–382.
7. Petrovitch H, Curb JD, Bloom-Marcus E: Isolated systolic hypertension and risk in Japanese-American men. *Stroke* 1995;26:25–29.
8. James GD, Pickering TG, Yeels LS, Harshfield GA, Riva S, Laragh JH: The reproducibility of average ambulatory, home, and clinic pressures. *Hypertension* 1988;11:545–549.
9. Trazzi S, Muti E, Frattola A, Imhertz B, Parati G, Mancia G: Reproducibility of non-invasive and intra-arterial blood pressure monitoring: implications for studies on antihypertensive treatment. *J Hypertens* 1991;9:115–119.
10. Pickering TG, James GD, Boddie C, Harshfield GA, Blank S, Laragh JH: How common is white coat hypertension? *JAMA* 1988;259:225–228.
11. Ohkubo T, Imai Y, Tsuji I, Nagai K, Kato J, Kikuchi N, Nishiyama A, Aihara A, Sekino M, Kikuya M, Ito S, Satoh H, Hisamichi S: Home blood pressure measurement has a stronger predictive power for mortality than does screening blood pressure measurement: a population-based observation in Ohasama, Japan. *J Hypertens* 1998;16:971–975.
12. Hozawa A, Ohkubo T, Nagai K, Kikuya M, Matsubara M, Tsuji I, Ito S, Satoh H, Hisamichi S, Imai Y: Prognosis of isolated systolic and diastolic hypertension as assessed by self-measurement of blood pressure at home: the Ohasama Study. *Arch Intern Med* 2000;160:3301–3306.
13. Lin JM, Hsu KL, Chiang FT, Tseng CD, Tseng YZ: Influence of isolated diastolic hypertension identified by ambulatory blood pressure on target organ damage. *Int J Cardiol* 1995;48:311–316.
14. Ohkubo T, Imai Y, Tsuji I, Nagai K, Watanabe N, Minami N, Itoh O, Bando T, Sakuma M, Fukao A, Satoh H, Hisamichi S, Abe K: Prediction of mortality by ambulatory blood pressure monitoring versus screening blood pressure measurements: a pilot study in Ohasama. *J Hypertens* 1997;15:357–364.
15. Ohkubo T, Hozawa A, Nagai K, Kikuya M, Tsuji I, Ito S, Satoh H, Hisamichi S, Imai Y: Prediction of stroke by ambulatory blood pressure monitoring versus screening blood pressure measurements in a general population: the Ohasama Study. *J Hypertens* 2000;18:847–854.
16. Ohkubo T, Kikuya M, Metoki H, Asayama K, Obara T, Hashimoto J, Totsune K, Hoshi H, Satoh H, Imai Y: Prognosis of “masked” hypertension and “white-coat” hypertension detected by 24-h ambulatory blood pressure monitoring 10-year follow-up from the Ohasama Study. *J Am Coll Cardiol* 2005;46:508–515.
17. Björklund K, Lind L, Zethelius B, Andrén B, Lithell H: Isolated ambulatory hypertension predicts cardiovascular morbidity in elderly men. *Circulation* 2003;107:1297–1302.
18. Hansen TW, Jeppesen J, Rasmussen S, Ibsen H, Torp-Pedersen C: Ambulatory blood pressure and mortality: a population-based study. *Hypertension* 2005;45:499–504.

19. Imai Y, Nagai K, Sakuma M, Sakuma H, Nakatsuka H, Satoh H, Minami N, Munakata M, Hashimoto J, Yamagishi T, Watanabe N, Yabe T, Nishiyama A, Abe K: Ambulatory blood pressure of adults in Ohasama, Japan. *Hypertension* 1993;22:900–912.
20. Imai Y, Nihei M, Abe K, Sasaki S, Minami N, Munakata M, Yumita S, Onoda H, Sekino H, Yamakoshi K, Yoshinaga K: A finger volume-oscillometric device for monitoring ambulatory blood pressure: laboratory and clinical evaluation. *Clin Exp Hypertens [A]* 1987;9:2001–2025.
21. Imai Y, Abe K, Sasaki S, Minami N, Munakata M, Sekino H, Nihei M, Yoshinaga K: Determination of clinical accuracy and nocturnal blood pressure pattern by new portable device for monitoring indirect ambulatory blood pressure. *Am J Hypertens* 1990;3:293–301.
22. Association for the Advancement of Medical Instrumentation: American national standard for electronic or automated sphygmomanometers. Washington, DC: Association for the Advancement of Medical Instrumentation; 1987.
23. Japanese Society of Hypertension: Japanese Society of Hypertension guidelines for the management of hypertension. *Hypertens Res* 2006;29(Suppl):S1–S106.
24. Chobanian AV, Bakris GL, Black HR, Cushman WC, Green LA, Izzo JL Jr., Jones DW, Materson BJ, Oparil S, Wright JT Jr., Roccella EJ, National Heart, Lung, and Blood Institute Joint National Committee on Prevention, Detection, Evaluation, and Treatment of High Blood Pressure. National High Blood Pressure Education Program Coordinating Committee. The Seventh Report of the Joint National Committee on Prevention, Detection, Evaluation, and Treatment of High Blood Pressure: the JNC 7 report. *JAMA* 2003;289:2560–2572.
25. Whisnant JP, Basford JR, Bernstein EF, Cooper ES, Dyken ML, Easten JD, Little JR, Marler JR, Millikan CH, Petito CK, Price TR, Raichle ME, Robertson JT, Thiele B, Walker MD, Zimmerman RA: Special report from the National Institute of Neurological Disorders and Stroke. Classification of cerebrovascular disease III. *Stroke* 1990;21:637–676.
26. Cox DR: Regression models and life tables. *J R Stat Soc [B]* 1972;34:187–202.
27. Inoue R, Ohkubo T, Kikuya M, Metoki H, Asayama K, Obara T, Hoshi H, Hashimoto J, Totsumi K, Satoh H, Kondo K, Imai Y: Predicting stroke using four ambulatory blood pressure monitoring-derived blood pressure indices. The Ohasama Study. *Hypertension* 2006;48:877–882.
28. Fang XH, Zhang XH, Yang QD, Dai XY, Su FZ, Rao ML, Wu SP, Du XL, Wang WZ, Li SC: Subtype hypertension and risk of stroke in middle-aged and older Chinese: a 10-year follow-up study. *Stroke* 2006;37:38–43.
29. Franklin SS, Barboza MG, Pio JR, Wong ND: Blood pressure categories, hypertensive subtypes, and the metabolic syndrome. *J Hypertens* 2006;24:2009–2016.
30. Franklin SS, Pio JR, Wong ND, Larson MG, Leip EP, Vasan RS, Levy D: Predictors of new-onset diastolic and systolic hypertension: the Framingham Heart Study. *Circulation* 2005;111:1121–1127.
